# Supplementary material for: The SARS-CoV-2 antibody landscape is lower in magnitude for structural proteins, diversified for accessory proteins and stable long-term in children
Source: PubMed Central journal article supplement — medRxiv. 2021 Jan 4:2021.01.03.21249180. Preprint. [Version 2] doi: 10.1101/2021.01.03.21249180 (PMC7924280; doi:10.1101/2021.01.03.21249180), 2021-01-04
Supplement: media-1.pdf [file media-1.pdf]

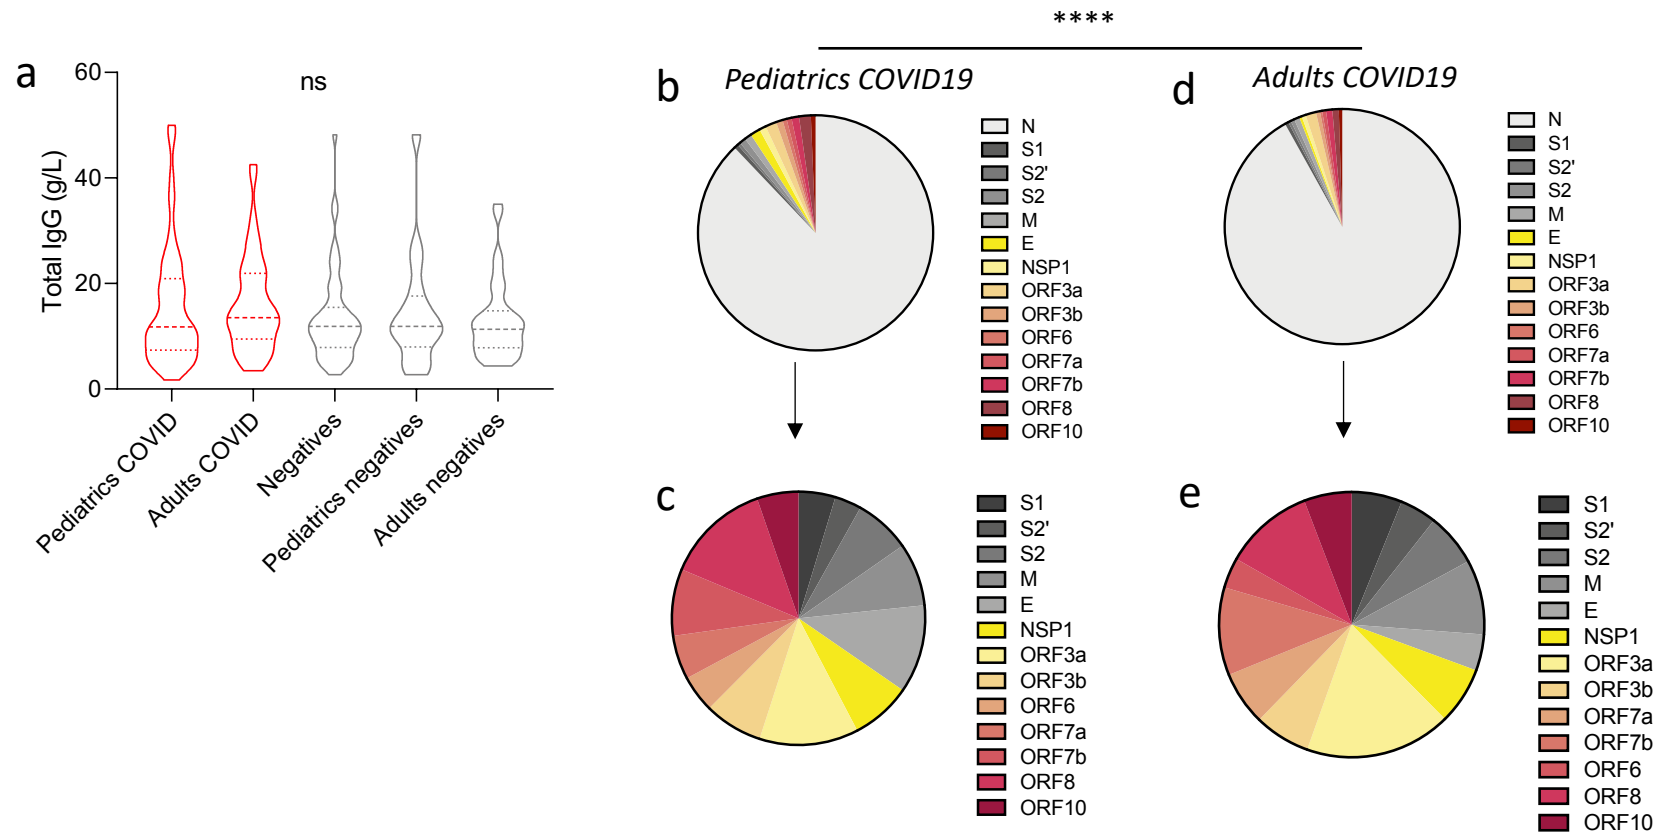

**Supplementary figure 1.** (a) Levels of total IgG (g/L) in plasma measured by ELISA in the pediatrics COVID (n=254), adults COVID (n=36), negatives (n=33), and pediatrics negatives (n=20), adults negatives (n=13). (b-e) Pie charts of the cumulative antibody responses to the 14 relevant SARS-CoV-2 structural and non-structural protein antigens in COVID-19 children (b, c) and adults (d, e). Due to the differences in scale between N and all other 10 antigens, a second pie-chart excluding N responses was done to focus on other antibody responses (c, e). \* shows statistical significance. Two-sided P values were calculated using a Chi-square test between the “observed” (pediatric) versus “expected” (adult) distributions. \*\*\*\* p<0,0001.

**a**

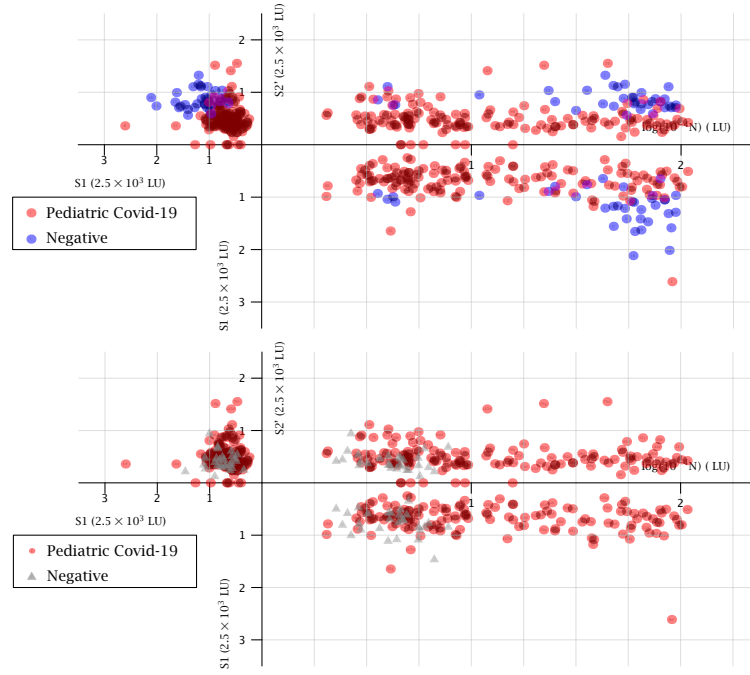

**b**

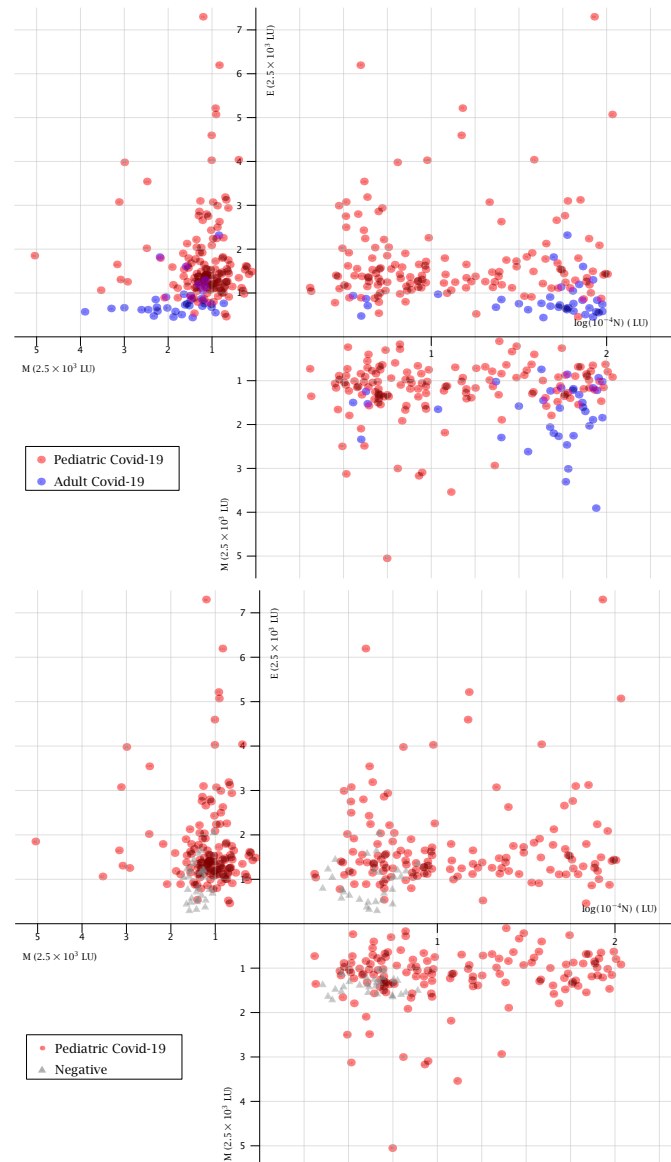

**Supplemental Figure 2. Representation of the pediatric COVID-19 population as a cluster of points.** (a) N, S1, S2' antibodies combination for the pediatric COVID-19 population versus the adult COVID-19 population (top) and for the pediatric COVID-19 population versus the negative population (bottom). (b) N, M, E antibodies combination for the pediatric COVID-19 population versus the adult COVID-19 population (top) and for the pediatric COVID-19 population versus the negative population (bottom). Patients are presented according to their values of SARS-CoV-2 individual antibodies as  $(x, y, z)$  in the space. COVID-19 children patients (n=144) are represented as red dots. COVID-19 adult patients (n=36) are represented in blue. The negative population (n=28) is represented in gray.

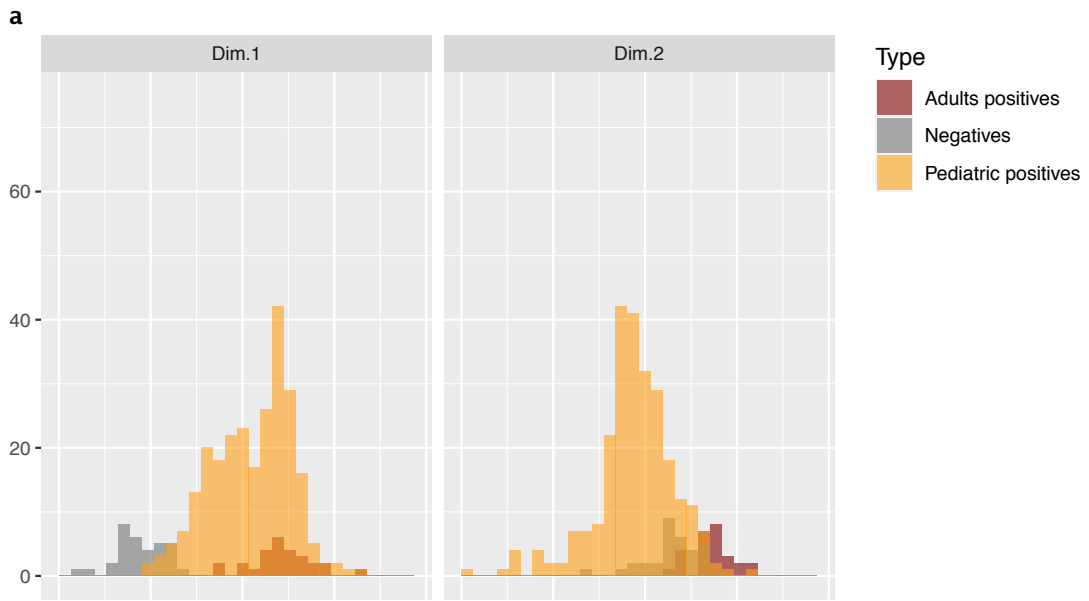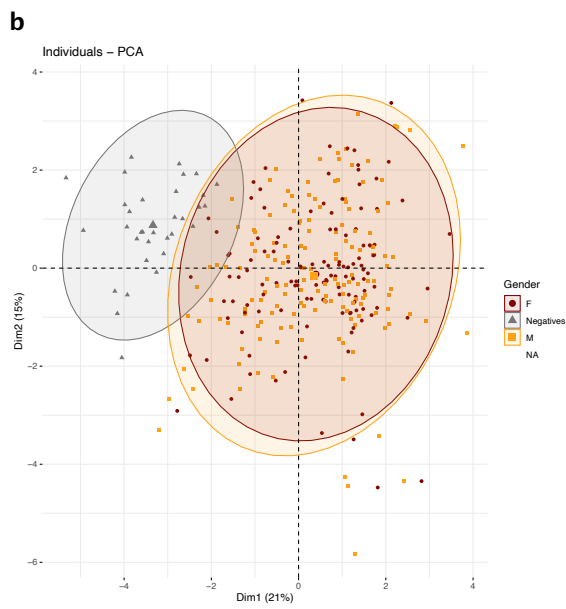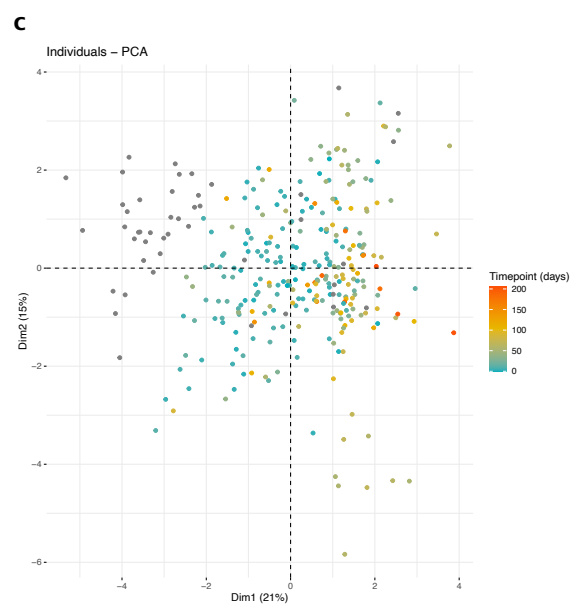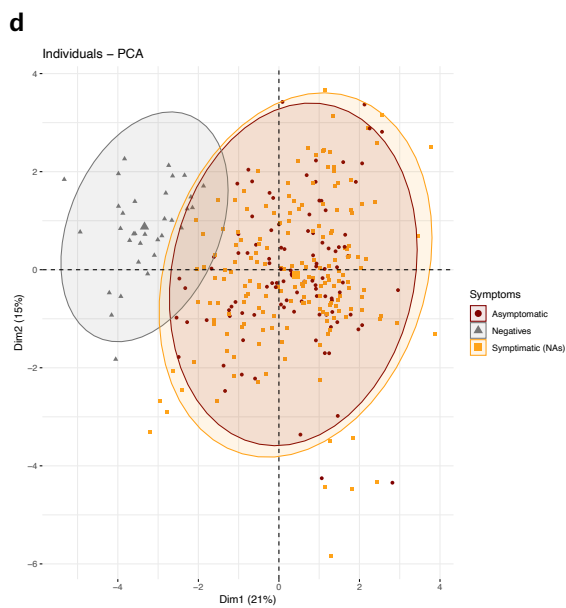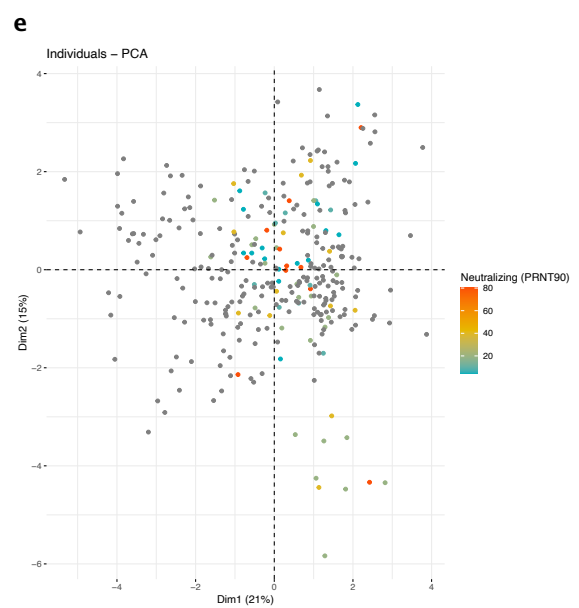

**Supplemental Figure 3. Principal Component Analysis.** (a) Distributions of the Principal Components (Dim1 and Dim2) colored by sample-type: Pediatric positives, Adult positives, Negatives. (b-e) Factorial plot of PCA on dimension 1 and 2 for gender (b), time-point (c), symptoms (d) and neutralization data (PRNT90) (e).

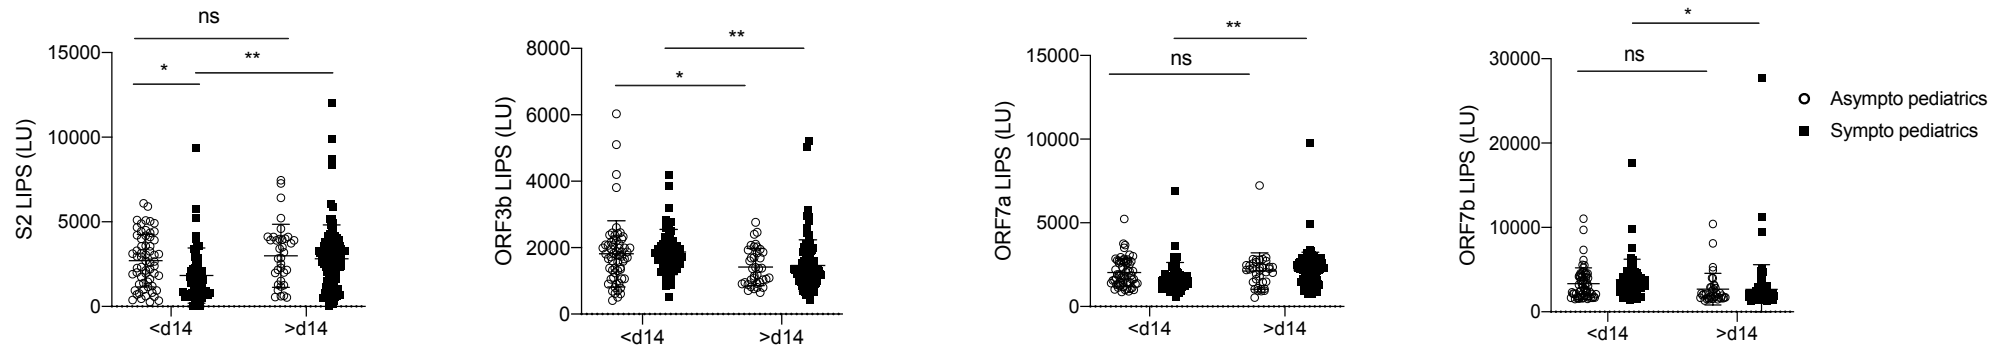

**Supplemental Figure 4.** Stratification of S2, ORF3b, ORF7a and ORF7b antibody levels measured by LIPS according to symptoms and time-point of sampling (prior day 14 or after day 14). Two-sided P values were calculated using the Mann-Whitney U test. \* shows statistical significance between symptomatic and asymptomatic samples or between early and late samples. \* $p < 0.05$ , \*\* $p < 0.01$ .

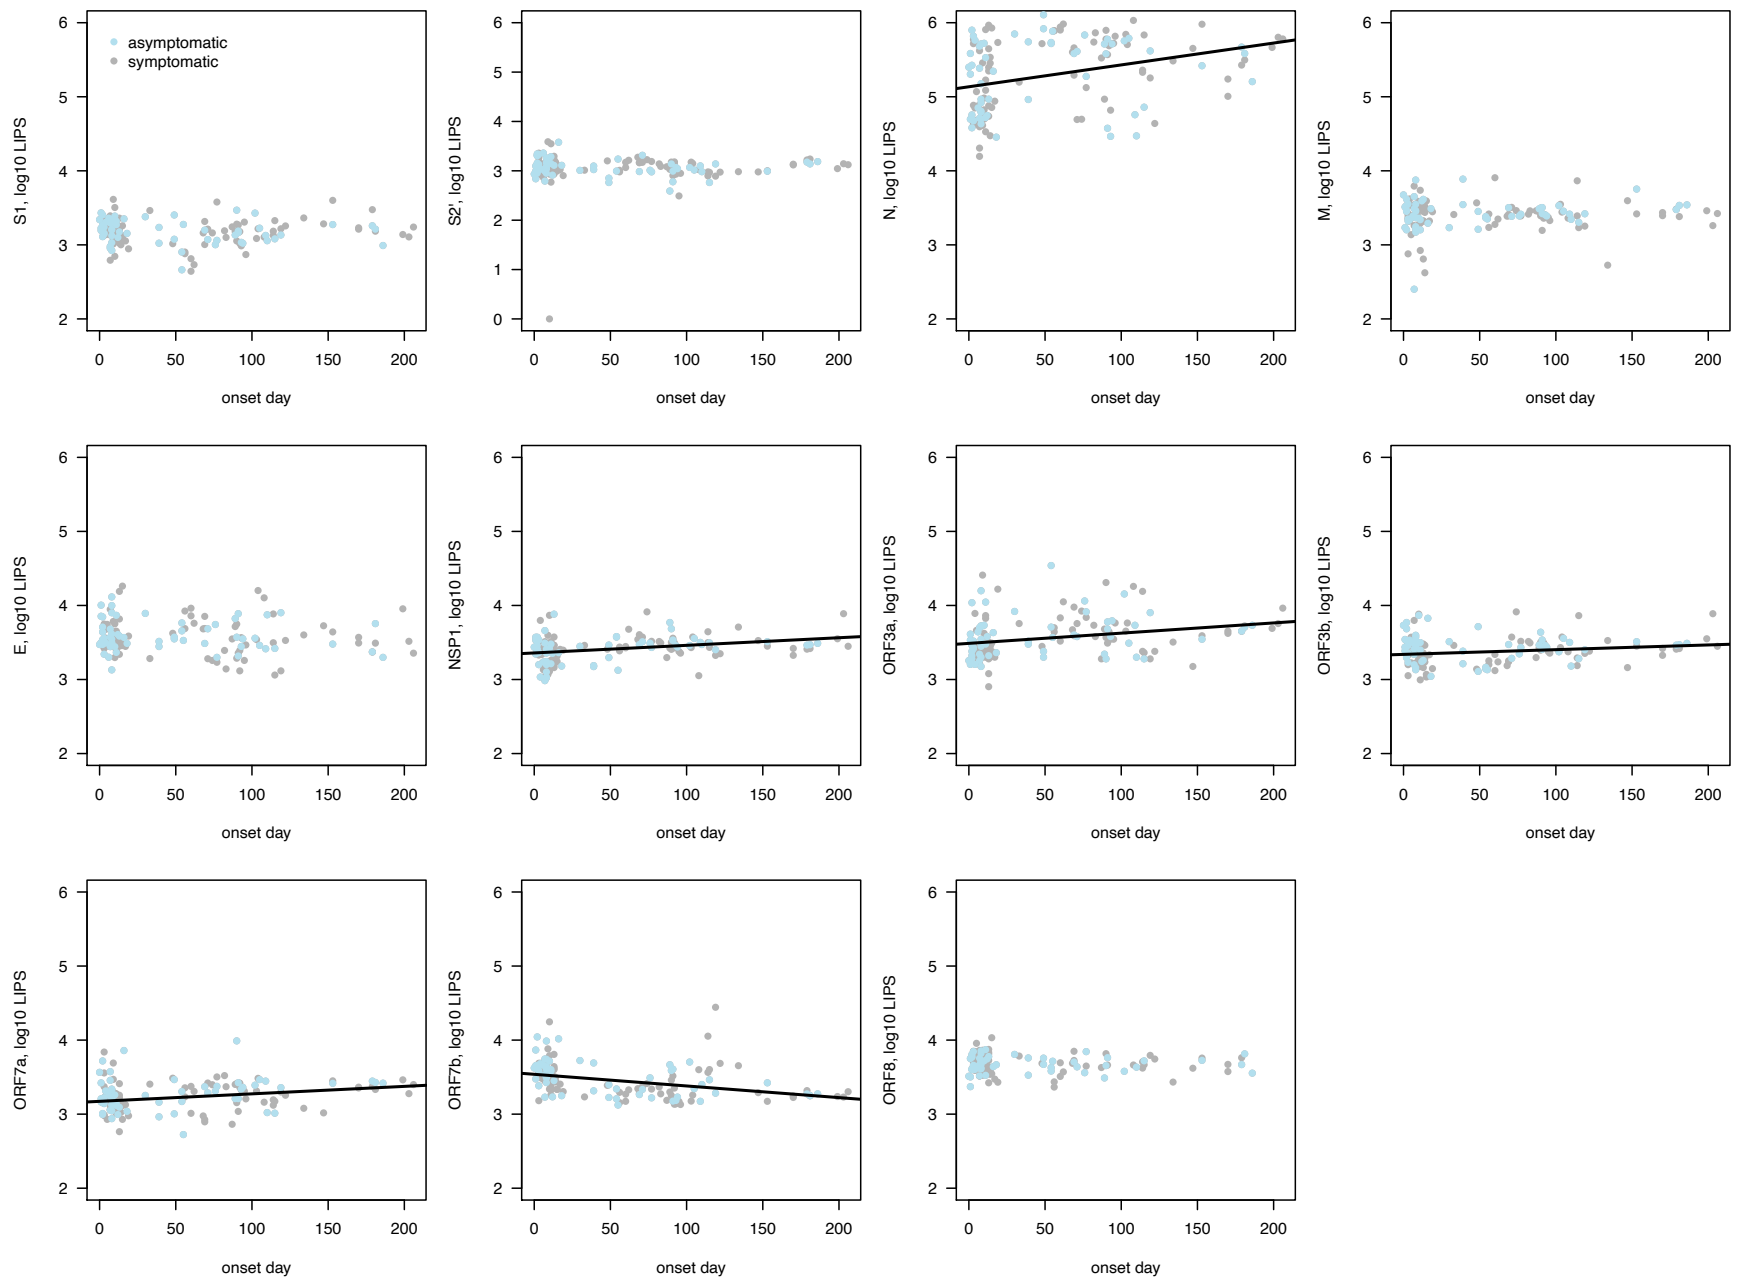

**Supplemental Figure 5. Longitudinal antibody responses in asymptomatic and symptomatic COVID-19 children.** Longitudinal analysis of 11 relevant antibody responses for structural (S1, S2', N, M, E) and non-structural (NSP-1, ORF3a, ORF3b, ORF7a, ORF7b, ORF8) SARS-CoV-2 proteins in asymptomatic (light blue) and symptomatic (grey) COVID-19 children.

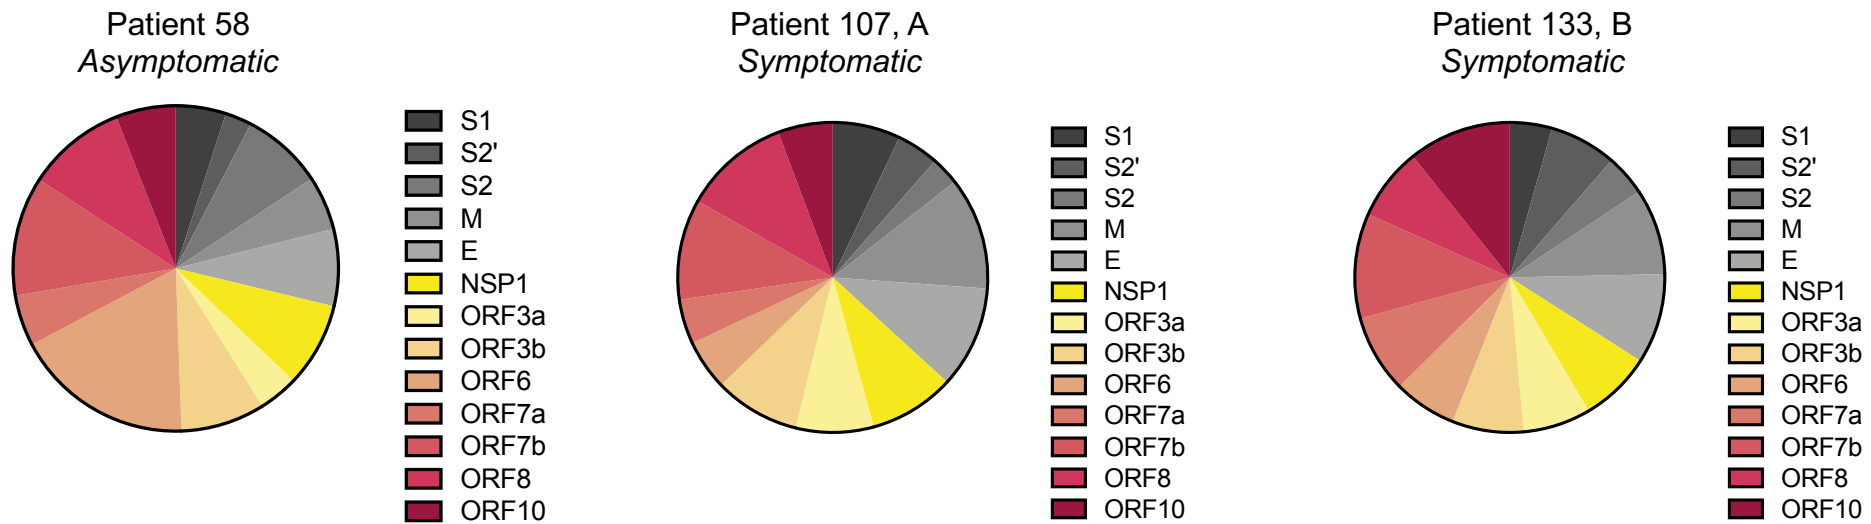

**Supplemental Figure 6.** Single pie charts of the cumulative antibody responses to the relevant SARS-CoV-2 structural and non-structural protein antigens (excluding N) for the COVID-19 pediatric patients producing the highest levels of IFN- $\alpha$ . (from Figure 7).



**Supplemental Table 1.** Correlation between variables and Principal Components 1 and 2 (Dimension 1 and 2 of 14, represented in Figure 3d-f).

| Dimension | Variable | Correlation | p.value |
|-----------|----------|-------------|---------|
| 1         | N        | 0.5921686   | 0.00000 |
| 1         | S1       | 0.0906619   | 0.10884 |
| 1         | S2'      | 0.1981899   | 0.00041 |
| 1         | S2       | 0.4552057   | 0.00000 |
| 1         | ORF7a    | 0.5495707   | 0.00000 |
| 1         | ORF3b    | 0.6786038   | 0.00000 |
| 1         | ORF7b    | -0.0681466  | 0.22853 |
| 1         | NSP1     | 0.6656403   | 0.00000 |
| 1         | ORF10    | -0.2925584  | 0.00000 |
| 1         | E        | 0.275052    | 0.00000 |
| 1         | M        | -0.1509175  | 0.00739 |
| 1         | ORF6     | -0.3774847  | 0.00000 |
| 1         | ORF8     | 0.6342754   | 0.00000 |
| 1         | ORF3a    | 0.6259408   | 0.00000 |
| 2         | N        | -0.0821349  | 0.14648 |
| 2         | S1       | 0.6981859   | 0.00000 |
| 2         | S2'      | 0.131899    | 0.01938 |
| 2         | S2       | 0.3052223   | 0.00000 |
| 2         | ORF7a    | 0.5271245   | 0.00000 |
| 2         | ORF3b    | 0.3465305   | 0.00000 |
| 2         | ORF7b    | 0.5554244   | 0.00000 |
| 2         | NSP1     | -0.1296366  | 0.02158 |
| 2         | ORF10    | 0.608538    | 0.00000 |
| 2         | E        | -0.44982    | 0.00000 |
| 2         | M        | 0.3325727   | 0.00000 |
| 2         | ORF6     | 0.2425214   | 0.00001 |
| 2         | ORF8     | -0.1286999  | 0.02255 |
| 2         | ORF3a    | -0.0883815  | 0.11807 |
